# Supplementary material
Source: publisher site journal article supplement (https://www.spandidos-publications.com/128/downloadSupplementary)

Figure S1. Downregulation of CHOP and Beclin1 mRNA following transfection with siRNA. (A) Transfection with CHOP siRNA reduced the mRNA expression levels of CHOP in H9c2 cells. (B) Transfection with Beclin1 siRNA reduced the mRNA expression levels of Beclin1 in H9c2 cells. H9c2 cells were transfected with CHOP siRNA, Beclin1 siRNA or Con siRNA for 6 h. The mRNA expression levels of CHOP and Beclin1 were determined via reverse transcription-quantitative polymerase chain reaction analysis. Statistical analysis is shown. Data are presented as the means  $\pm$  standard error of the mean of three independent experiments. \* $P < 0.05$  vs. Con siRNA. CHOP, C/EBP homologous protein; Con, control; siRNA, small interfering RNA.

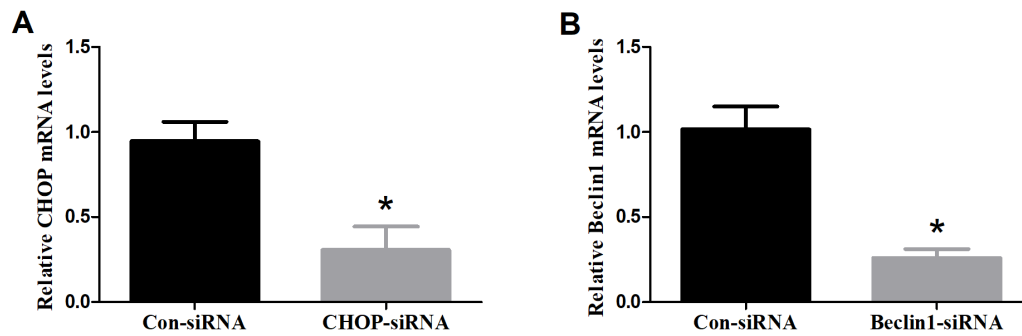

Supplement: Supplementary file 1 [file downloadSupplementary]
